# Supplementary material for: Real-time 3D monitoring of NIR laser effects on biodegradable polymers
Source: Research Square preprint supplement (doi:10.21203/rs.3.rs-8491680/v1), 2026-01-13
Supplement: Supplementary file 1 [file f19b9e244cbec4e5033104a6.pdf]

## Supplementary Information

### **Real-time 3D Monitoring of IR Laser Effects on Biodegradable Polymers**

Madeh Sajjadi<sup>1,†</sup>, Ramin Jamali<sup>1,†</sup>, and Ali-Reza Moradi<sup>1,2,\*</sup>

<sup>1</sup> Department of Physics, Institute for Advanced Studies in Basic Sciences (IASBS),  
Zanjan 45137-66731, Iran

<sup>2</sup> School of Quantum Physics and Matter, Institute for Research in Fundamental  
Sciences (IPM), Tehran 19395-5531, Iran

<sup>†</sup> These authors contributed equally to this work.

\*Corresponding author: *moradika@iasbs.ac.ir*

## **Contents:**

### **Visualization 1**

Digital holograms of SKZ biopolymers' time evolution under NIR irradiation.

### **Visualization 2**

Digital holograms of SKZ biopolymers' time evolution under NIR irradiation at a laser power of 250 mW.

### **Visualization 3**

Digital holograms of SKZ biopolymers' time evolution under NIR irradiation at a laser power of 500 mW

### **Visualization 4**

Digital holograms of SKZ biopolymers' time evolution under NIR irradiation at a laser power of 750 mW.
